# Supplementary material for: Epidemiology of nodding syndrome in the Greater Mundri area, South Sudan: Prevalence, spatial pattern and environmental risk factors
Source: PLoS Negl Trop Dis. 2022 Jul 28;16(7):e0010630. doi: 10.1371/journal.pntd.0010630 (PMC9362928; doi:10.1371/journal.pntd.0010630)
Supplement: S1 Table — (XLSX) [file pntd.0010630.s001.xlsx]

## Sheet: NS numbers & percentages
NS TOTAL NUMBERS AND PERCENTAGES
	Nodding
	No	Yes	Weighted mean							No	Yes	Weighted mean
hh	1575	386	1961						hh	1575	386	1961
lagNS	0.18146	0.272539	0.199388				1.50192		lagNS	0.18146	0.272539	0.199388
tt_wtr	7.51325	8.79439	7.76542				1.17052		tt_wtr	7.51325	8.79439	7.76542
lat	5.33328	5.2852	5.32382				0.990985		lat	5.33328	5.2852	5.32382
riv_dist	2.28528	1.92189	2.21375				0.840986		riv_dist	2.28528	1.92189	2.21375
	Count (TRUE)			Percent (True; eg having cows)						Count (FALSE)			Percent (FALSE; eg not having cows)
	NO	YES	Total	No Nodding	Nodding	Overall	Ratio nodding/no nodding			NO	YES	Total	No Nodding	Nodding	Overall
cows	133	40	173	0.0844444	0.103627	0.0922667	1.22716		cows	1358	344	1702	0.862222	0.891192	0.867925
goat	374	103	477	0.23746	0.266839	0.2544	1.12372		goat	1117	281	1398	0.709206	0.727979	0.712902
sheep	42	14	56	0.0266667	0.0362694	0.0298667	1.3601		sheep	1449	370	1819	0.92	0.958549	0.927588
poaltry	956	275	1231	0.606984	0.712435	0.656533	1.17373		poaltry	535	109	644	0.339683	0.282383	0.328404
bicycle	62	10	72	0.0393651	0.0259067	0.0384	0.658115		bicycle	1429	374	1803	0.907302	0.968912	0.919429
car	14	8	22	0.00888889	0.0207254	0.5	2.33161		car	14	8	22	0.00888889	0.0207254	0.0112188
drnk_any	62	10	72	0.0393651	0.0259067	0.0384	0.658115		drnk_any	1429	374	1803	0.907302	0.968912	0.919429
drnk_borehole	247	77	324	0.156825	0.199482	0.790244	1.272		drnk_borehole	56	30	86	0.0355556	0.0777202	0.0438552
drnk_well	7	3	10	0.00444444	0.00777202	0.0243902	1.7487		drnk_well	296	104	400	0.187937	0.26943	0.203978
drnk_spring	3	0	3	0.00190476	0	0.00731707	0		drnk_spring	300	107	407	0.190476	0.277202	0.207547
drnk_rain	3	0	3	0.00190476	0	0.00731707	0		drnk_rain	300	107	407	0.190476	0.277202	0.207547
drnk_river	49	29	78	0.0311111	0.0751295	0.190244	2.41488		drnk_river	254	78	332	0.16127	0.202073	0.169301
drnk_pond	18	2	20	0.0114286	0.00518135	0.0487805	0.453368		drnk_pond	285	105	390	0.180952	0.272021	0.198878
drnk_tanker	2	0	2	0.00126984	0	0.00487805	0		drnk_tanker	301	107	408	0.191111	0.277202	0.208057
cook_borehole	240	75	315	0.152381	0.194301	0.768293	1.2751		cook_borehole	63	32	95	0.04	0.0829016	0.0484447
cook_well	9	3	12	0.00571429	0.00777202	0.0292683	1.3601		cook_well	294	104	398	0.186667	0.26943	0.202958
cook_spring	2	0	2	0.00126984	0	0.00487805	0		cook_spring	301	107	408	0.191111	0.277202	0.208057
cook_rain	2	2	4	0.00126984	0.00518135	0.0097561	4.08031		cook_rain	301	105	406	0.191111	0.272021	0.207037
cook_river	49	28	77	0.0311111	0.0725389	0.187805	2.33161		cook_river	254	79	333	0.16127	0.204663	0.169811
cook_pond	21	3	24	0.0133333	0.00777202	0.0585366	0.582902		cook_pond	282	104	386	0.179048	0.26943	0.196838
hndw_any	14	10	24	0.00888889	0.0259067	0.5	2.91451		hndw_any	14	10	24	0.00888889	0.0259067	0.0122387
hndw_borehole	232	72	304	0.147302	0.186528	0.741463	1.2663		hndw_borehole	71	35	106	0.0450794	0.0906736	0.0540541
hndw_well	9	3	12	0.00571429	0.00777202	0.0292683	1.3601		hndw_well	294	104	398	0.186667	0.26943	0.202958
hndw_spring	3	0	3	0.00190476	0	0.00731707	0		hndw_spring	300	107	407	0.190476	0.277202	0.207547
hndw_rain	3	2	5	0.00190476	0.00518135	0.0121951	2.72021		hndw_rain	300	105	405	0.190476	0.272021	0.206527
hndw_river	56	31	87	0.0355556	0.0803109	0.212195	2.25874		hndw_river	247	76	323	0.156825	0.196891	0.164712
hndw_pond	29	6	35	0.0184127	0.015544	0.0853659	0.844202		hndw_pond	274	101	375	0.173968	0.261658	0.191229
bath_any	62	10	72	0.0393651	0.0259067	0.0384	0.658115		bath_any	1429	374	1803	0.907302	0.968912	0.919429
bath_borehole	1	1	2	0.000634921	0.00259067	0.5	4.08031		bath_borehole	1	1	2	0.000634921	0.00259067	0.00101989
bath_well	9	4	13	0.00571429	0.0103627	0.0317073	1.81347		bath_well	294	103	397	0.186667	0.266839	0.202448
bath_spring	4	0	4	0.00253968	0	0.0097561	0		bath_spring	299	107	406	0.189841	0.277202	0.207037
bath_rain	3	3	6	0.00190476	0.00777202	0.0146341	4.08031		bath_rain	300	104	404	0.190476	0.26943	0.206017
bath_river	62	10	72	0.0393651	0.0259067	0.0384	0.658115		bath_river	1429	374	1803	0.907302	0.968912	0.919429
bath_pond	31	4	35	0.0196825	0.0103627	0.0853659	0.526492		bath_pond	272	103	375	0.172698	0.266839	0.191229
moved	200	57	257	0.126984	0.147668	0.13714	1.16289		moved	1290	327	1617	0.819048	0.84715	0.824579
loc_idp	24	7	31	0.0152381	0.0181347	0.121569	1.19009		loc_idp	174	50	224	0.110476	0.129534	0.114227
meal_size	1442	371	1813	0.915556	0.96114	0.966933	1.04979		meal_size	49	13	62	0.0311111	0.0336788	0.0316165
meal_freq	1442	371	1813	0.915556	0.96114	0.966933	1.04979		meal_freq	49	13	62	0.0311111	0.0336788	0.0316165
no_meal	1409	361	1770	0.894603	0.935233	0.944504	1.04542		no_meal	82	22	104	0.0520635	0.0569948	0.0530342
IVM	103	46	149	0.0653968	0.119171	0.363415	1.82227		IVM	200	61	261	0.126984	0.158031	0.133095
